# Supplementary material
Source: Hindawi journal article supplement (doi:10.1155/2011/460543)

**HIPPOCAMPUS**

□ YOUNG SALINE    ■ AGED SALINE    ▒ AGED pro-NGF

**A TrkA RATIO**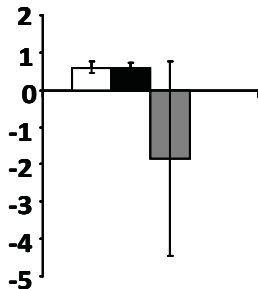**B 140 kD TrkA**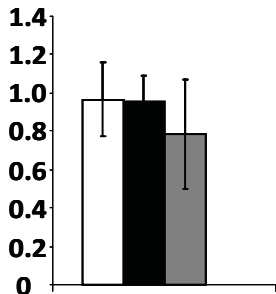**C 110kD TrkA**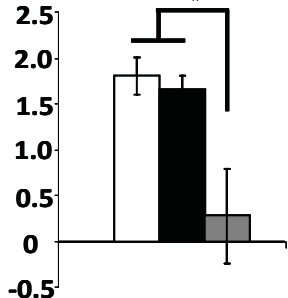**D CASPASE RATIO**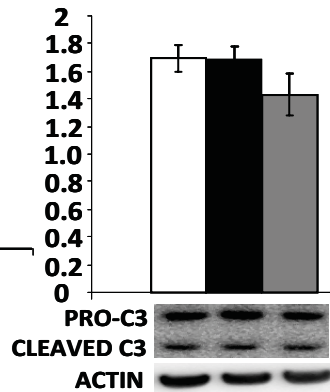**E PLASMINOGEN**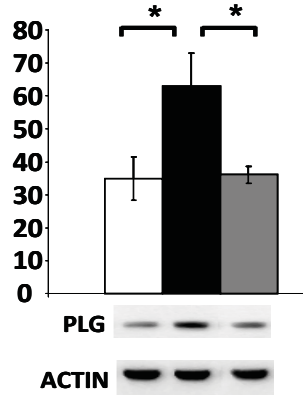**BASAL FOREBRAIN****F TrkA RATIO**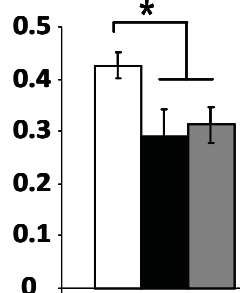**G 140kD TrkA**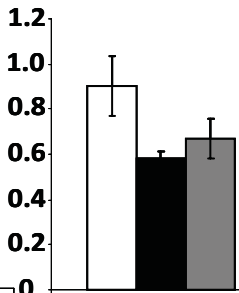**H 110 kD TrkA**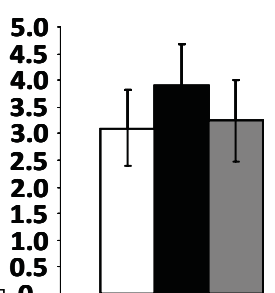**I CASPASE RATIO**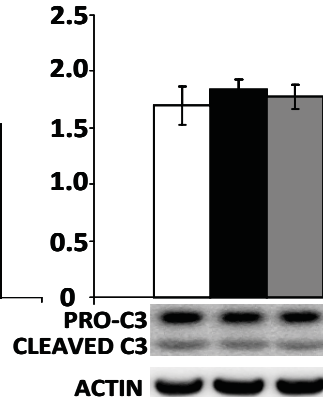**J PLASMINOGEN**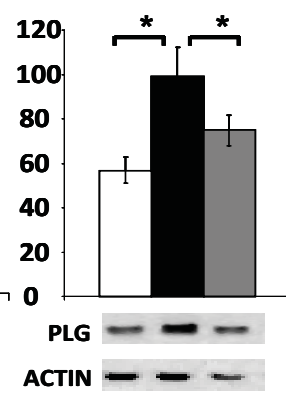

Supplement: f1 [file 460543.f1.pdf]
