# Supplementary material
Source: Hindawi journal article supplement (doi:10.1155/2011/460543)

**A**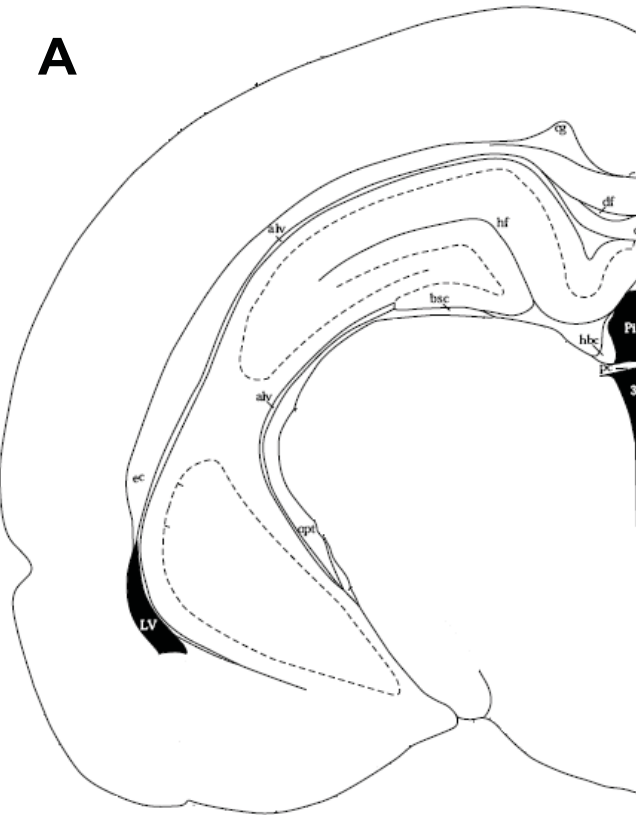**B**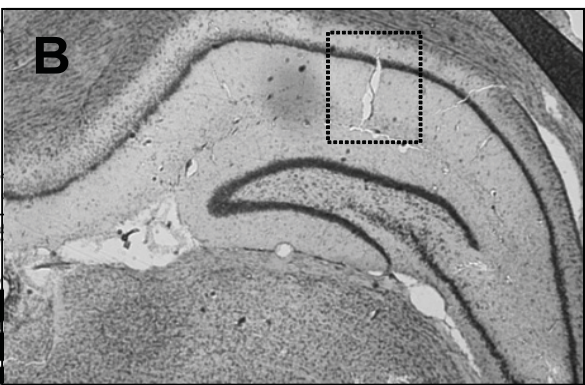**C**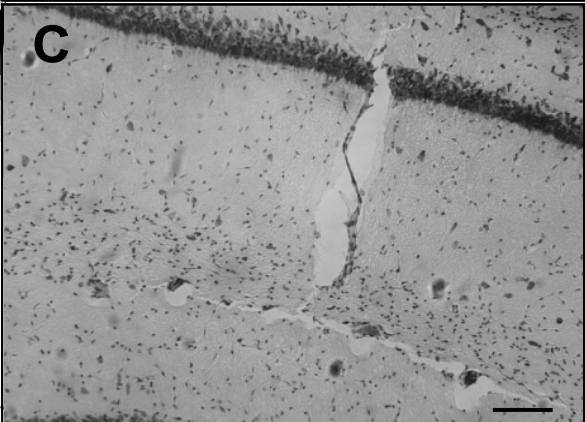

Supplement: f2 [file 460543.f2.pdf]
